# Supplementary material for: Mitochondrial MICOS complex genes, implicated in hypoplastic left heart syndrome, maintain cardiac contractility and actomyosin integrity
Source: eLife. 2023 Jul 5;12:e83385. doi: 10.7554/eLife.83385 (PMC10361721; doi:10.7554/eLife.83385)
Supplement: Figure 1—source data 1. — Orthology based on DIOPT score. Conserved Drosophila candidate HLHS genes were knocked down individually in the Drosophila heart using the Hand4.2-Gal4 driver. The functional phenotypes listed were significantly different relative to ControlA or ControlB and were measured in 1-week-old female Drosophila hearts. [file elife-83385-fig1-data1.xlsx]

## Sheet: Sheet1
Human Gene	Fly Gene	DIOPT	Fly phenotype when knocked down (Hand4.2)
RHBDL2	rho-4	6	none
CAP1	capt	14	Constricted, reduced cardiac output
SZT2	No fly ortholog
RNF149	gol	7	none
CHCHD6	Chchd3/6	6	Reduced contractility
MTRR	CG14882	8	none
MBTPS1	S1P	14	none
DGKE	Dgkepsilon	13	Arrhythmic, dilated
C17orf67	No fly ortholog
