# Supplementary material for: Mitochondrial MICOS complex genes, implicated in hypoplastic left heart syndrome, maintain cardiac contractility and actomyosin integrity
Source: eLife. 2023 Jul 5;12:e83385. doi: 10.7554/eLife.83385 (PMC10361721; doi:10.7554/eLife.83385)
Supplement: Figure 3—figure supplement 1—source data 1. [file elife-83385-fig3-figsupp1-data1.xlsx]

## Sheet: Sheet1
Human	Fly	Phenotype (Hand4.2; tdtK>)
Cofilin	tsr	lethal
		lethal
Profilin	chic	none
		lethal
Arp2/3	Arp	Reduced FS (increased SD), moderate myofibrillar disorganization
		none
Gelsolin	gel	Reduced FS (increased SD)
		none
Transgelin	Chd64	none
		Reduced FS (reduced DD), moderate myofibrillar disorganization
WASP	WASp	Reduced FS (reduced DD), strong myofibrillar disorganization
		Reduced FS (reduced DD)
WIP	Verprolin 1	none
		none
Formins	DAAM	none
		none
Tropomyosin	Tm1	Reduced FS (increased SD)
		none
