# Supplementary material for: Mitochondrial MICOS complex genes, implicated in hypoplastic left heart syndrome, maintain cardiac contractility and actomyosin integrity
Source: eLife. 2023 Jul 5;12:e83385. doi: 10.7554/eLife.83385 (PMC10361721; doi:10.7554/eLife.83385)
Supplement: Figure 6—source data 1. [file elife-83385-fig6-data1.xlsx]

## Sheet: Sheet1
Human gene	Fly gene
CHCHD3 (MICOS19)	Chchd3/6
CHCHD6 (MICOS25)
IMMT (MICOS60)	Mitofilin
APOO (MICOS26)	Mic26/27
APOOL (MICOS27)
MICOS13	QIL1
MICOS10	CG12479
SAMM50	CG7639
