# Supplementary material for: Mitochondrial MICOS complex genes, implicated in hypoplastic left heart syndrome, maintain cardiac contractility and actomyosin integrity
Source: eLife. 2023 Jul 5;12:e83385. doi: 10.7554/eLife.83385 (PMC10361721; doi:10.7554/eLife.83385)
Supplement: Figure 7—source data 1. — KD of Ckd12 with Chchd3/6 KD led to increased lethality of eclosed flies by 1 week-of-age. [file elife-83385-fig7-data1.xlsx]

## Sheet: Sheet1
					Lethality
Human gene	Fly gene	DIOPT	Function	RNAi line	Hand4.2, tdtK>	Hand4.2, tdtK; Chchd3/6RNAiC1>
RNF149	goliath	7	Ubiquitination, mesoderm formation	GolRNAiA1	0	0
				GolRNAiA2	0	0
CdK12	Cdk12	11	Transcription, RNA splicing	Cdk12RNAiA1	0.47	0.77
				Cdk12RNAiA2	0.5	0.88
SPTBN1	β-Spectrin	15	Crosslinks with actin, scaffolding	β-SpecRNAiA1	0	0
