# Supplementary material for: Mitochondrial MICOS complex genes, implicated in hypoplastic left heart syndrome, maintain cardiac contractility and actomyosin integrity
Source: eLife journal article supplement (doi:10.7554/elife.83385), 2023-07-05

Figure 3 – figure supplement 1

| Human       | Fly         | Phenotype (Hand <sup>4.2</sup> ; tdtK>)            |
|-------------|-------------|----------------------------------------------------|
| Cofilin     | tsr         | lethal                                             |
|             |             | lethal                                             |
| Profilin    | chic        | none                                               |
|             |             | lethal                                             |
| Arp2/3      | Arp         | ↓ FS (↑ SD), moderate myofibrillar disorganization |
|             |             | none                                               |
| Gelsolin    | gel         | ↓ FS (↑ SD)                                        |
|             |             | none                                               |
| Transgelin  | Chd64       | none                                               |
|             |             | ↓ FS (↓ DD), moderate myofibrillar disorganization |
| WASP        | WASp        | ↓ FS (↓ DD), strong myofibrillar disorganization   |
|             |             | ↓ FS (↓ DD)                                        |
| WIP         | Verprolin 1 | none                                               |
|             |             | none                                               |
| Formins     | DAAM        | none                                               |
|             |             | none                                               |
| Tropomyosin | Tm1         | ↓ FS (↑ SD)                                        |
|             |             | none                                               |

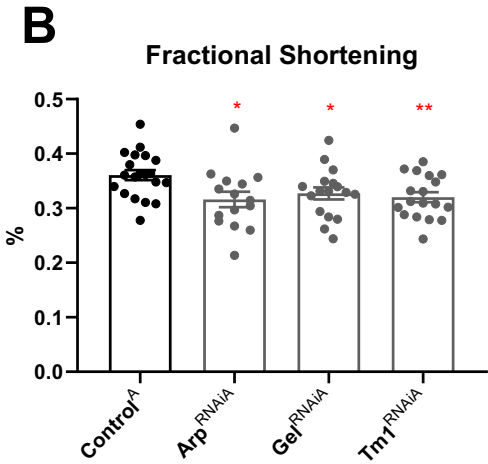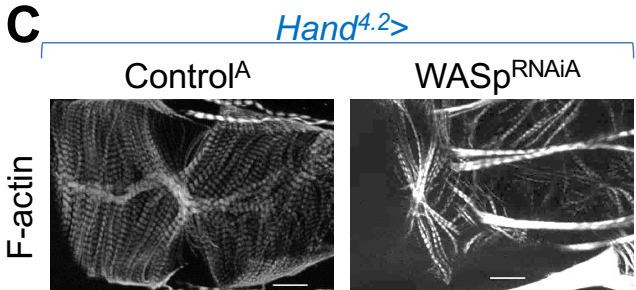

Supplement: supp [file elife-83385-supp-v1.zip]
