# Supplementary material for: Mitochondrial MICOS complex genes, implicated in hypoplastic left heart syndrome, maintain cardiac contractility and actomyosin integrity
Source: eLife. 2023 Jul 5;12:e83385. doi: 10.7554/eLife.83385 (PMC10361721; doi:10.7554/eLife.83385)
Supplement: Supplementary file 1. — Nine candidate genes harbored rare homozygous variants predicted to impact protein structure or gene regulation. Hom = homozygous, Het = heterozygous, WT = wildtype, gnomAD = Genome Aggregation Database, MAF = minor allele frequency. rsID: reference single nucleotide polymorphism ID. RegulomeDB variants range from 1 (high functional evidence) to 6 (least functional evidence). CADD score (Combined Annotation-Dependent Depletion), higher percentile predicts higher possibility of functionality or pathogenicity. [file elife-83385-supp1.xlsx]

## Sheet: Sheet1
Gene symbol	Chr	BP Position (hg38)	Transcript variant	Gene Region	Protein variant	rsID	RegulomeDB Rank for Regulatory Variants	CADD Score for Missense Variants (Percentile)	Genotype in sister	Genotype in brother	gnomAD MAF (%)
RHBDL2	1	38941780	c.-224C>T	5'UTR		rs570057342	4		Hom	Het	0.05
CAP1	1	40039733	c.-1061C>T; c.-1079C>T	Promoter		rs1033279388	4		Hom	Het	not reported
SZT2	1	43427349	c.3331G>T	Exonic	p.D1111Y	rs887336448		27 (85)	Hom	Het	not reported
RNF149	2	101308657	c.-69C>G	5'UTR		rs78958738	4		Het	Hom	0.65
CHCHD6	3	126704425	c.87+26C>A	Intronic		rs768047544	2b		Het	Hom	0.00117
MTRR	5	7889130	c.1263C>G; c.1182C>G	Exonic	p.D394E; p.D421E	rs149678769		8 (15)	Het	Hom	0.05
MBTPS1	16	84056017	c.2950G>A	Exonic	p.D984N	rs146299475		24 (65)	WT	WT	0.66
DGKE	17	56833747	c.-532A>C	Promoter		rs911884815	4		WT	Het	0.00326
C17orf67	17	56833747	c.-1131T>G	5'UTR		rs911884815	4		WT	Het	0.00326
