# Supplementary material for: Mitochondrial MICOS complex genes, implicated in hypoplastic left heart syndrome, maintain cardiac contractility and actomyosin integrity
Source: eLife. 2023 Jul 5;12:e83385. doi: 10.7554/eLife.83385 (PMC10361721; doi:10.7554/eLife.83385)
Supplement: Supplementary file 2. — RNAi lines of different mitochondrial functional groups were selected using the FlyBase.org gene ontology (GO) term mitochondrion (GO:0005739). The RNAi lines were crossed to Hand4.2-Gal4, tdtK and their progeny were assessed for contractility defects at 1-week of adult age using Hand4.2-Gal4; tdtK. Note that structural phenotype refers to any visible F-actin phenotype, not specifically to Chchd3/6 KD F-actin phenotype. FS = fractional shortening, DD = End diastolic diameter, SD = systolic diameter. [file elife-83385-supp2.xlsx]

## Sheet: Sheet1
Mitochondrial functional group	Gene	RNAi line	Functional phenotype	Structural (F-actin) phenotype
Mitochondrial fission&fusion	Drp1	RNAiA	none	none
		RNAiC	none	none
	Opa1	RNAiB	ê FS (é SD)	none
		RNAiC	ê FS (é SD)	Yes
	Marf	RNAiA	ê FS (é SD)	none
		RNAiB	ê FS (é SD)	none
ETC	ATPsynB (C.V)	RNAiA	ê FS (é SD)	Yes
		RNAiB	ê FS (é SD)	Yes
	ATPsynβ (C.V)	RNAiA	ê FS (é SD)	Yes
	ATPsynγ (C.V)	RNAiA	ê FS (é SD)	Yes
	ATPsynGL (C.V)	RNAiA	none	none
	blw (C.V)	RNAiA	ê FS (é SD)	Yes
	ATPsynC (C.V)	RNAiB	ê FS (é SD)	Yes
	mtND2 (C.I)	RNAiB	none	none
		RNAiC	ê FS (ê DD)	none
	ND-75 (C.I)	RNAiB	ê FS (é SD)	none
	SdhC (C.II)	RNAiC	ê FS (ê DD)	none
	Cyt-c1 (C.III)	RNAiA	ê FS (é SD)	none
		RNAiB	ê FS (é SD)	none
	mtCo1 (C.IV)	RNAiB	none	none
		RNAiC	ê FS (ê DD)	none
Cellular recycling	Park	RNAiA	none	none
		RNAiB	none	none
	Diap	RNAiC	none	none
Mitochondrial transporter	Rim2	RNAiA	none	none
		RNAiB	none	none
Mitochondria translation initiation factor	mIF2	RNAiC	ê FS (ê DD)	none
Heat shock protein chaperones 60	Hsp60A	RNAiC	none	none
Mitochondrial biogenesis	Srl	RNAiB	none	none
		RNAiC	none	none
Maintains cardiolipin	Taz	RNAiB	none	none
