# Supplementary material for: Mitochondrial MICOS complex genes, implicated in hypoplastic left heart syndrome, maintain cardiac contractility and actomyosin integrity
Source: eLife. 2023 Jul 5;12:e83385. doi: 10.7554/eLife.83385 (PMC10361721; doi:10.7554/eLife.83385)
Supplement: Supplementary file 3. — Rare, predicted-damaging variants in CHCHD3 and CHCHD6 were identified in 6 of 183 HLHS probands in the Mayo Clinic cohort and 1 in the Pediatric Cardiac Genomics Consortium (PCGC). Transcript and relevant protein variants are listed. rsID: reference single nucleotide polymorphism ID. RegulomeDB variants range from 1 (high functional evidence) to 6 (least functional evidence). CADD score (Combined Annotation-Dependent Depletion), higher percentile predicts higher possibility of functionality or pathogenicity. Corresponding Drosophila orthologs and orthology scores (DIOPT). *Annotation of variant for a non-canonical transcript (ENST00000448878). [file elife-83385-supp3.xlsx]

## Sheet: Sheet1
Gene Symbol	Proband	Mode of Inheritance	Transcript variant	Protein variant	RSID	RegulomeDB variant classification	CADD score for missense variants (percentile)	gnomAD MAF (%)	Fly homolog	DIOPT score
CHCHD6	11H	homozygous recessive	c.87+26C>A		rs768047544	2b		0.001	Chchd3/6	6
	158H	maternal	c.567-12104G>A		rs970505287	2a		0.023
	228H	unknown	c.622T>C	p.Y208H	rs145020754		28 (90)	0.124
CHCHD3	287H	maternal	c.524+1502C>G		N/A	2a		Not reported		11
	199H	maternal	c.524+1429A>G		rs911149927	4		Not reported
	179H	de novo	c.370-1242A>T; c.371A>T	p.D124	N/A		18 (35)	Not reported
	PCGC	transmitted	c.250C>T	p.R84X	rs889393988			0.0004
