# Supplementary figures and images for: Mitochondrial MICOS complex genes, implicated in hypoplastic left heart syndrome, maintain cardiac contractility and actomyosin integrity
Source: eLife journal article supplement (doi:10.7554/elife.83385), 2023-07-05

## Figure 4 – figure supplement 2

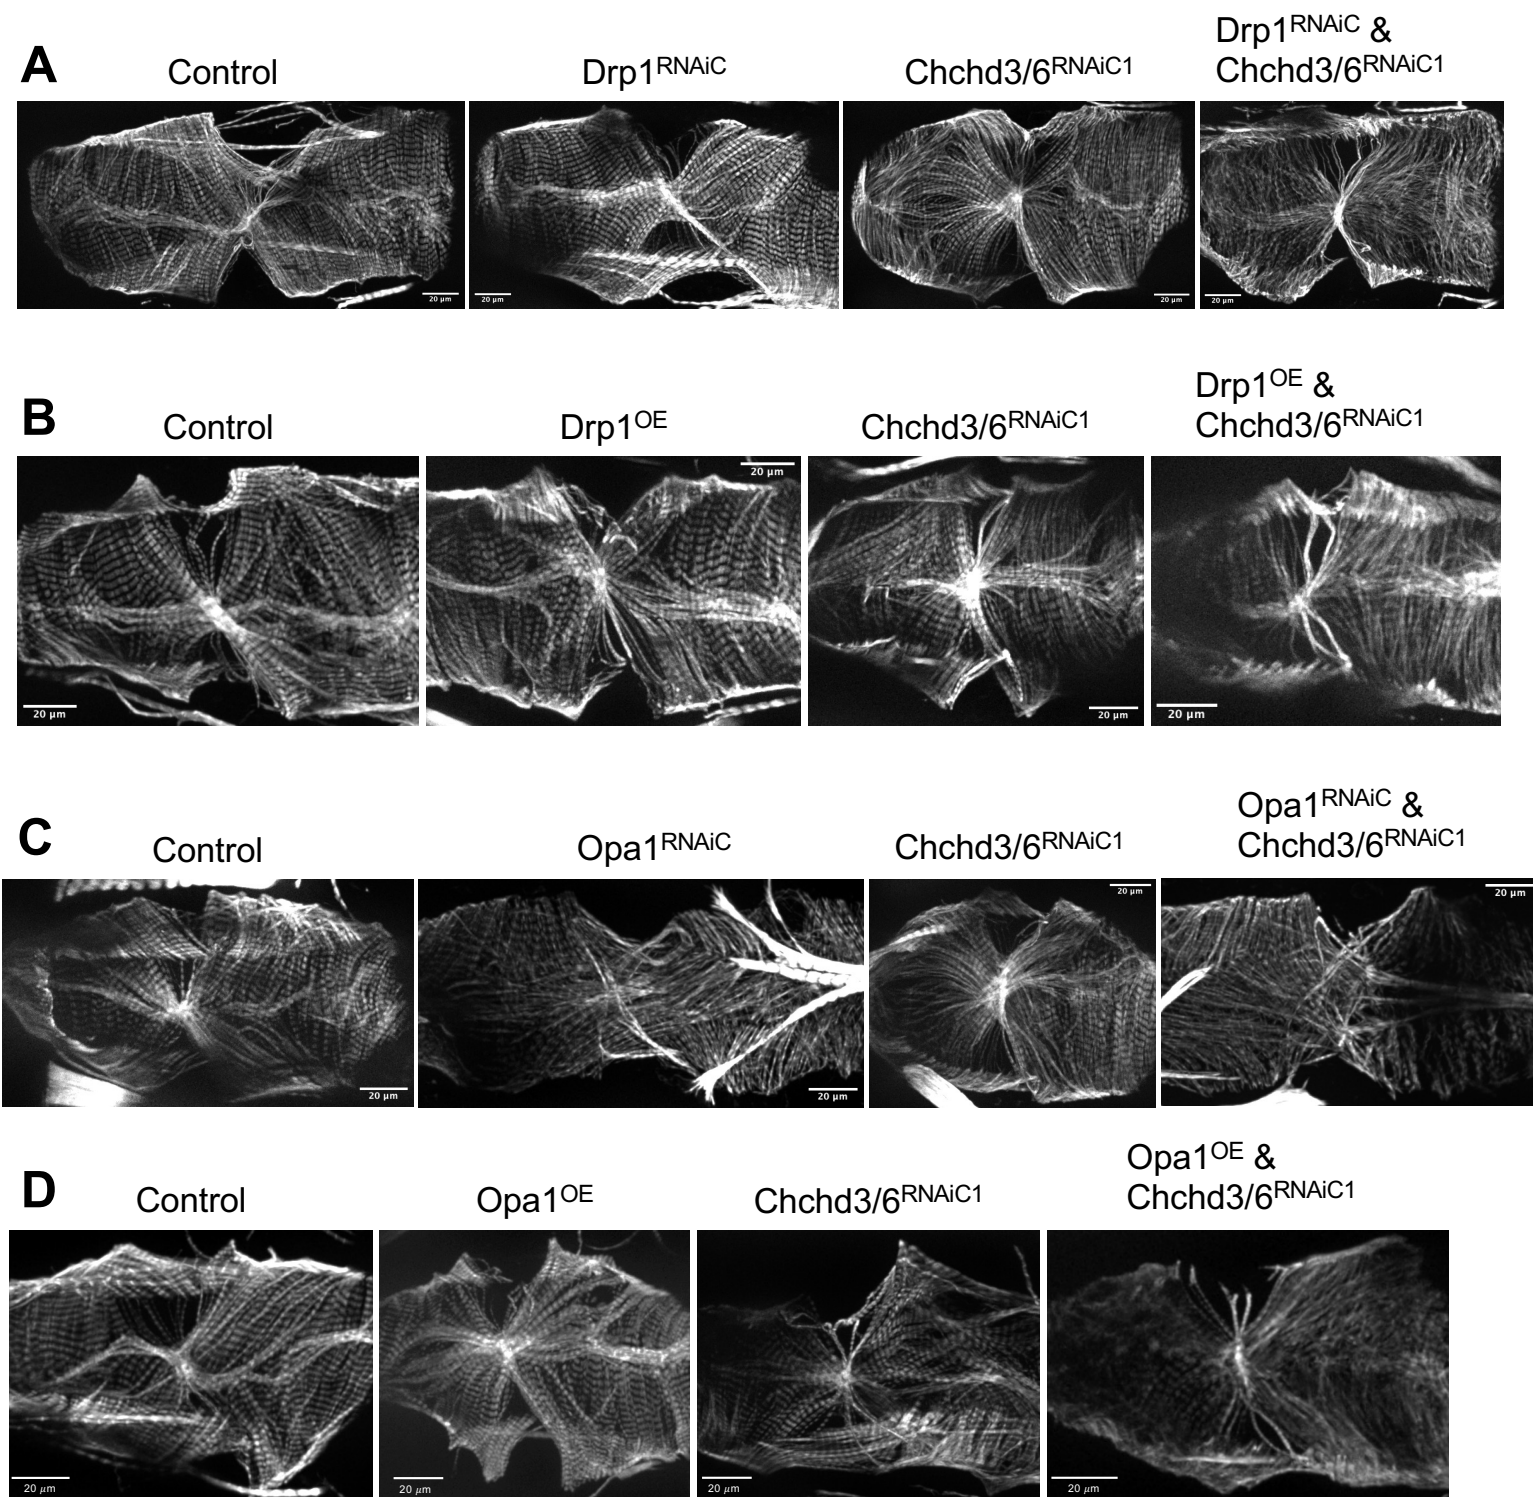

Supplement: supp [file elife-83385-supp-v1.zip]

# Figure 6 – figure supplement 2

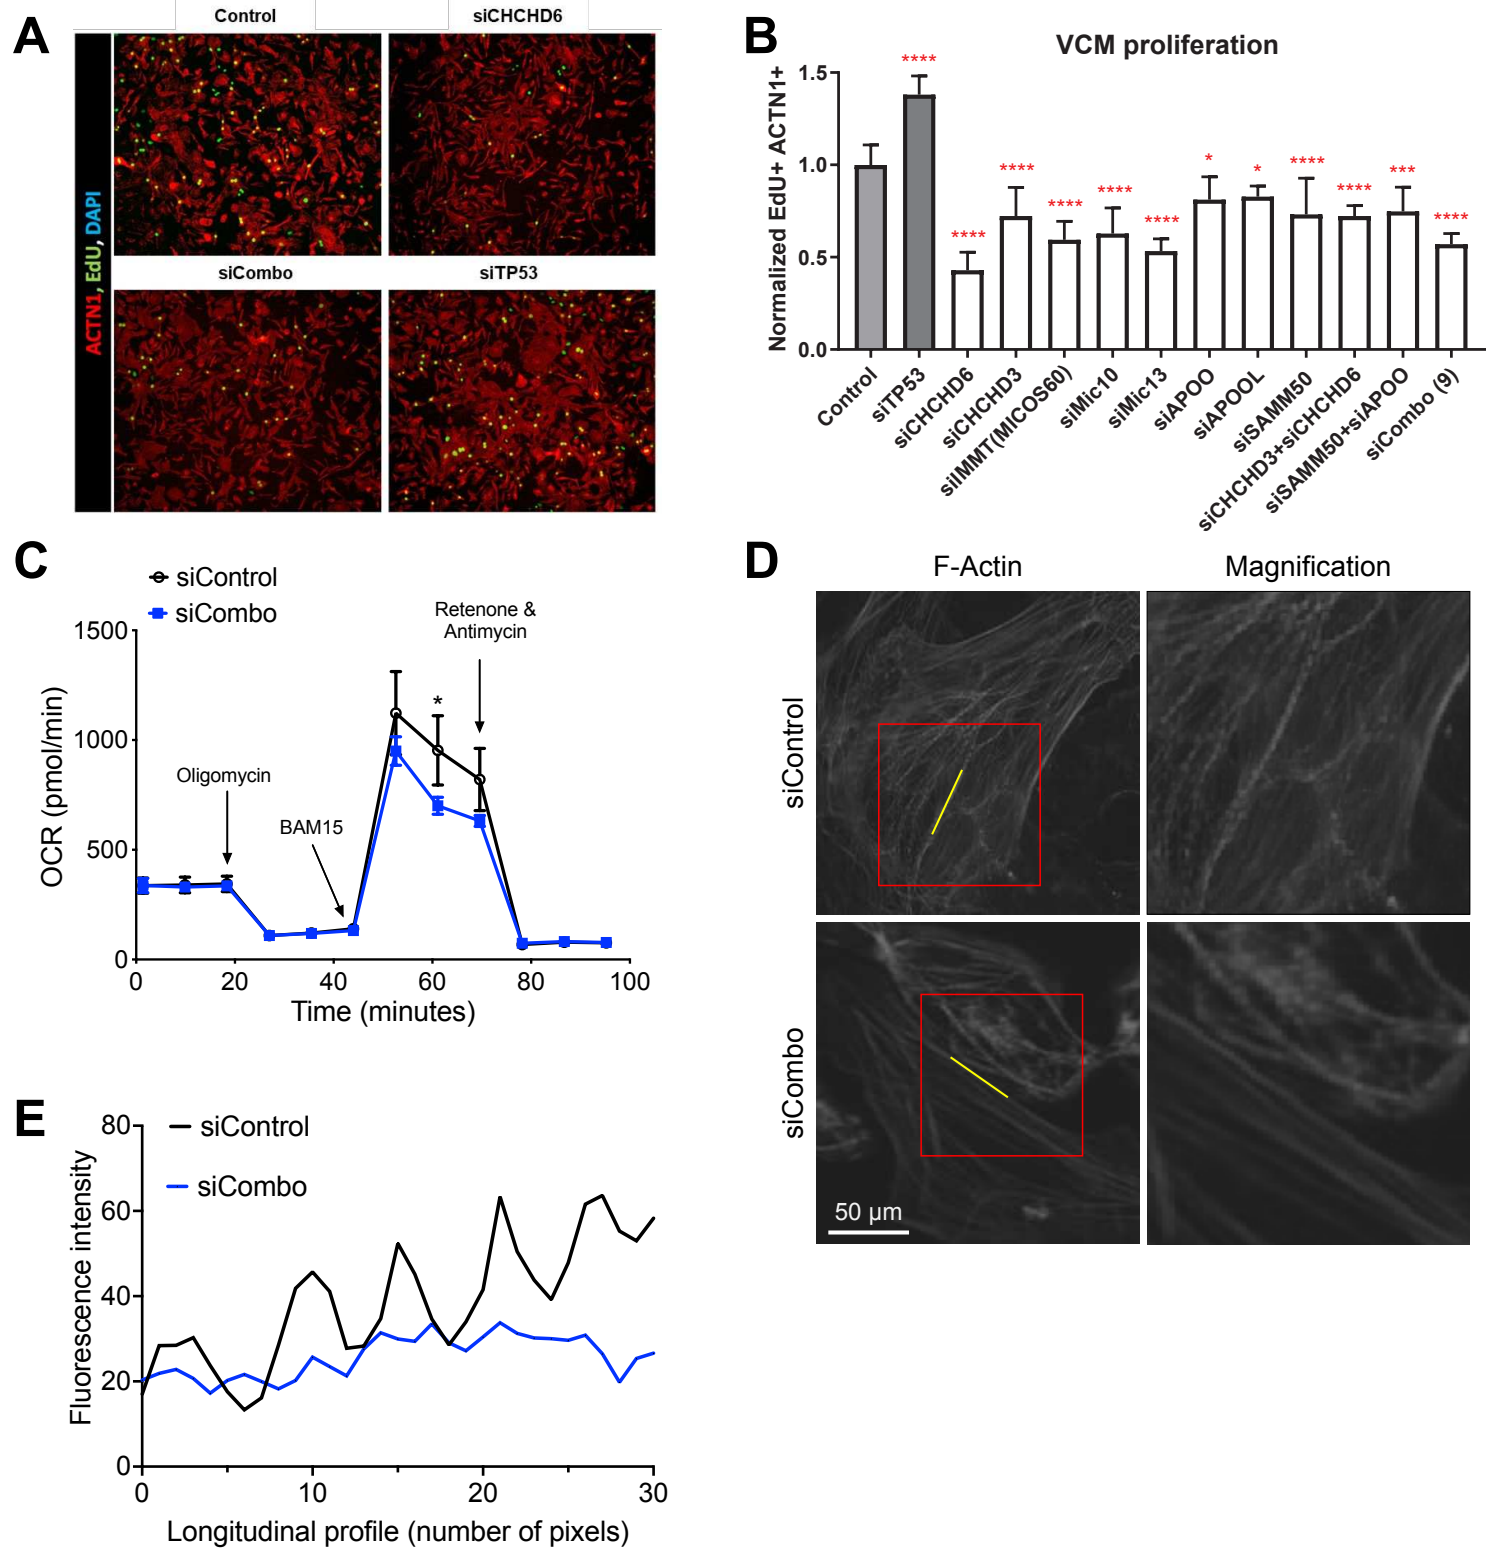

Supplement: supp [file elife-83385-supp-v1.zip]

# Figure 5 – figure supplement 1

**A**

*Hand<sup>4.2</sup>; tdtK>*

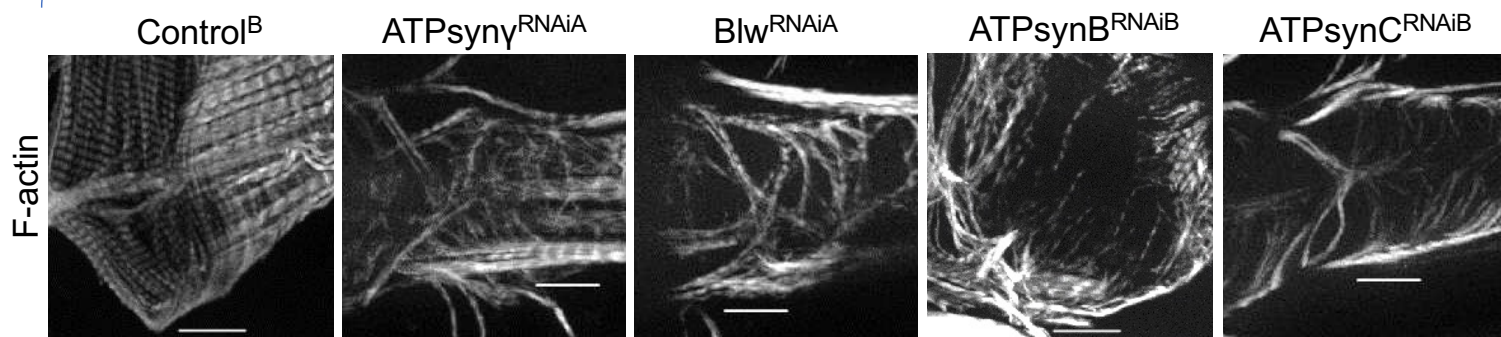

**B**

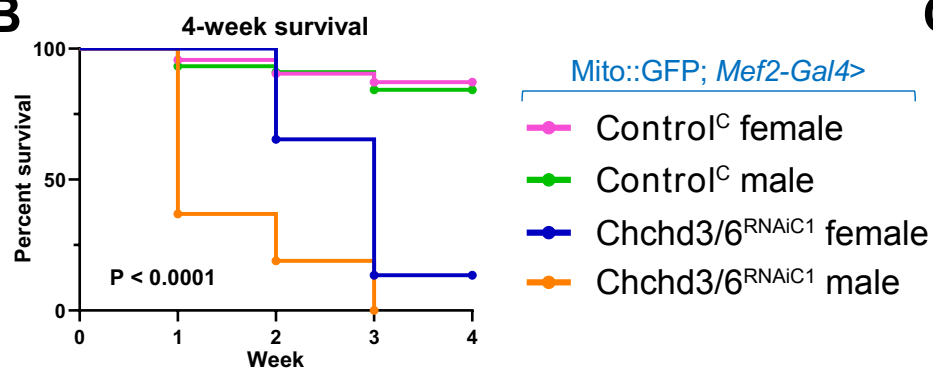

**C**

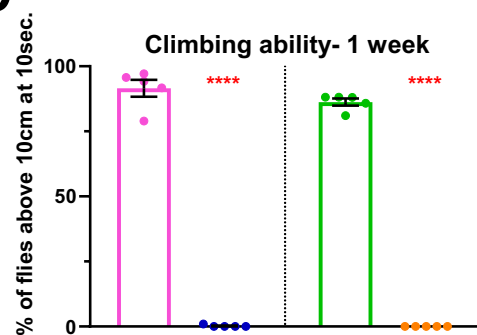

Supplement: supp [file elife-83385-supp-v1.zip]

# Figure 6 – figure supplement 1

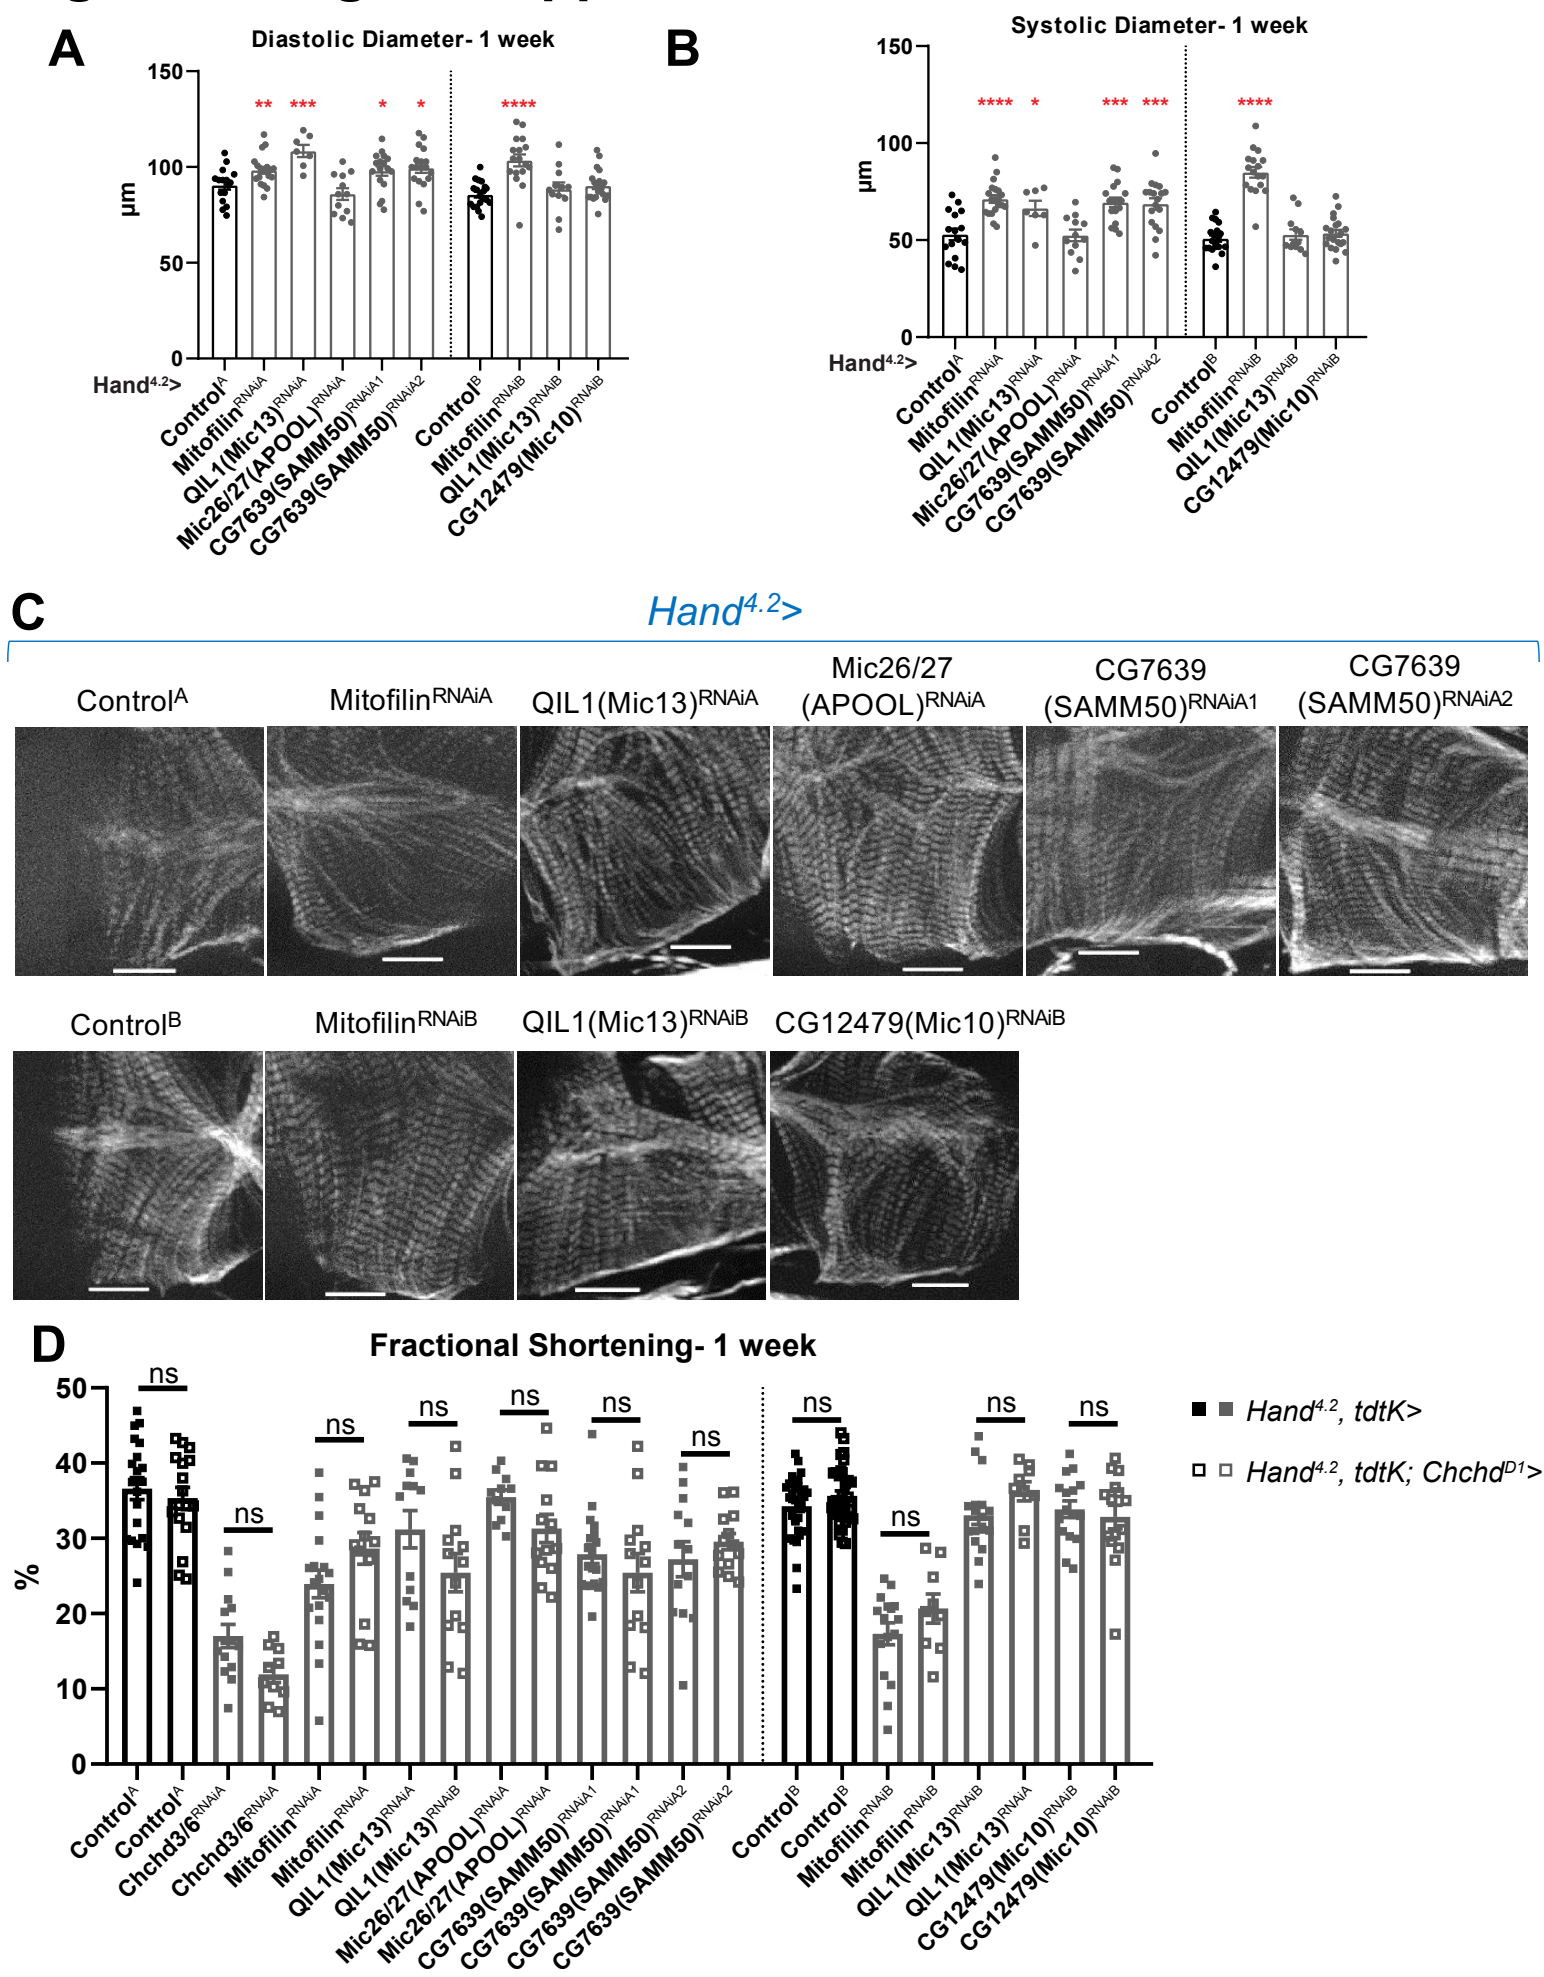

Supplement: supp [file elife-83385-supp-v1.zip]

# Figure 4 – figure supplement 1

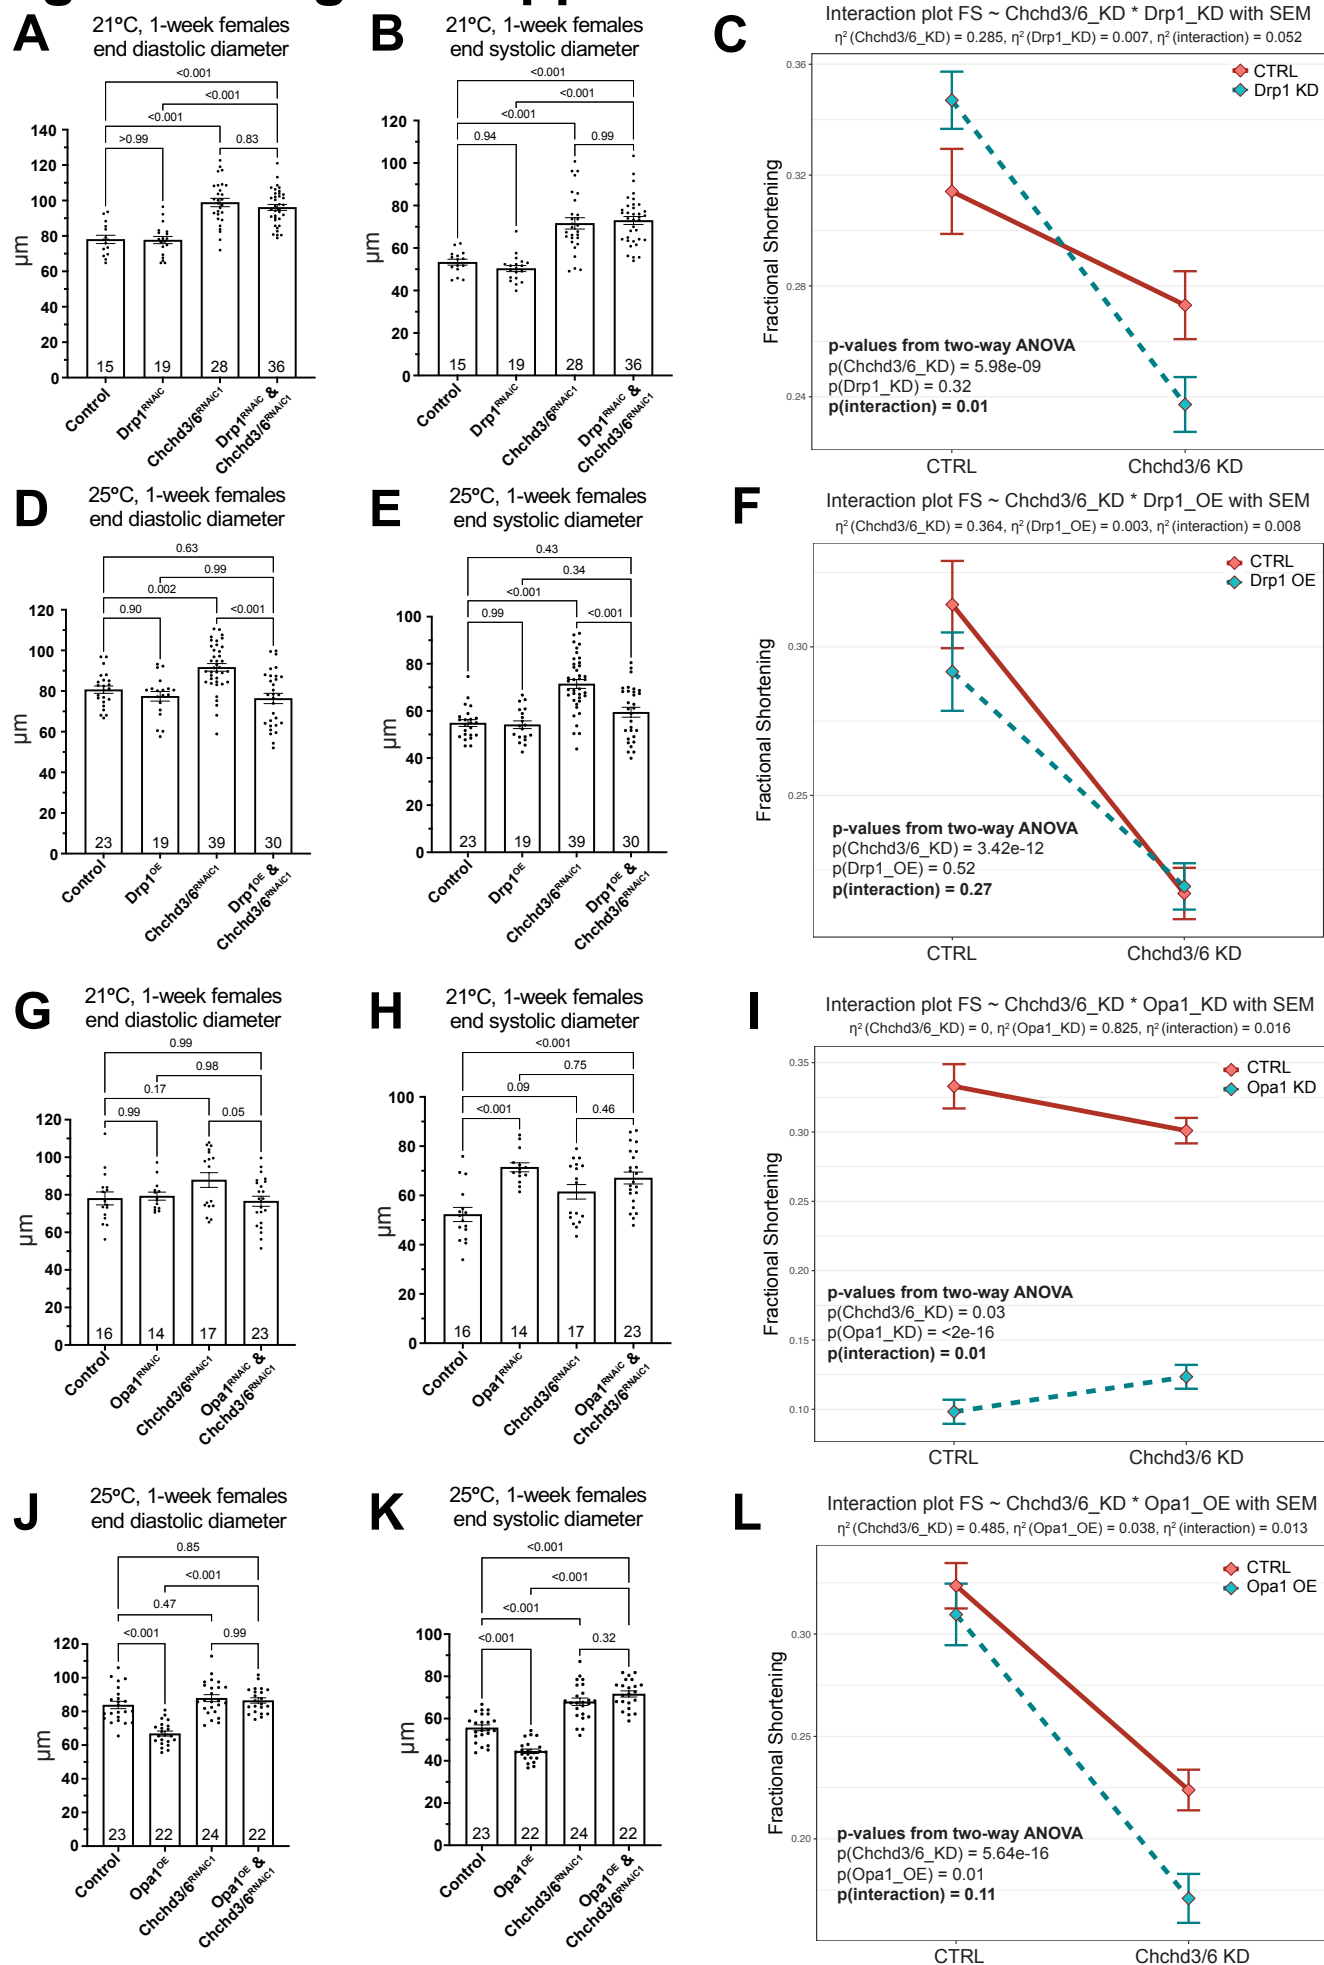

Supplement: supp [file elife-83385-supp-v1.zip]

# Figure 1 – figure supplement 1

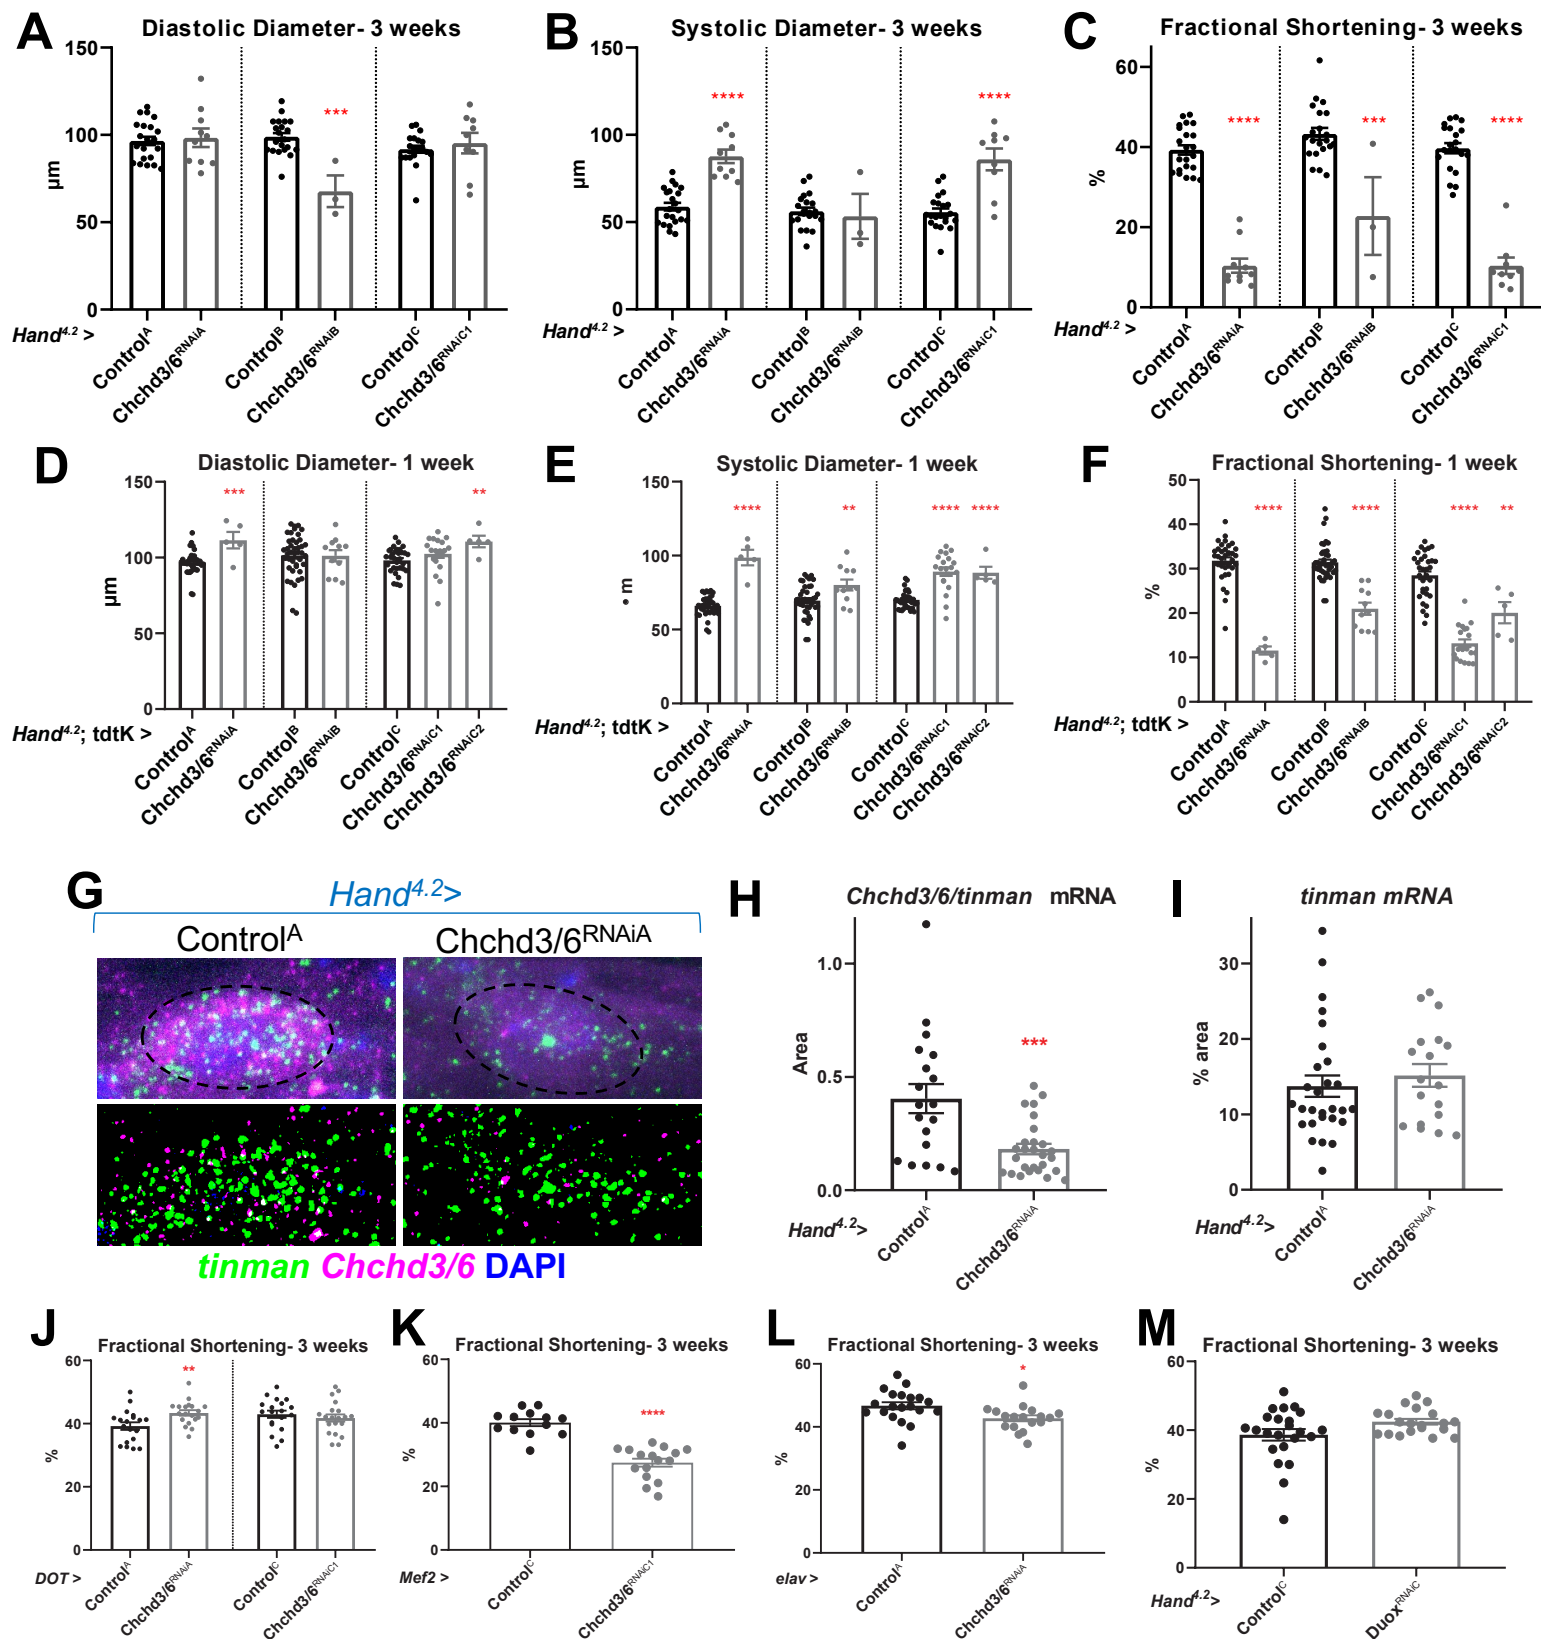

Supplement: supp [file elife-83385-supp-v1.zip]
